# Supplementary material for: First insights into the genotype–phenotype map of phenotypic stability in rye
Source: PubMed Central journal article supplement (PMC4449549; doi:10.1093/jxb/erv145), 2015-04-06
Supplement: supp_erv145_jexbot135137_file005.pdf [file supp_erv145_jexbot135137_file005.pdf]

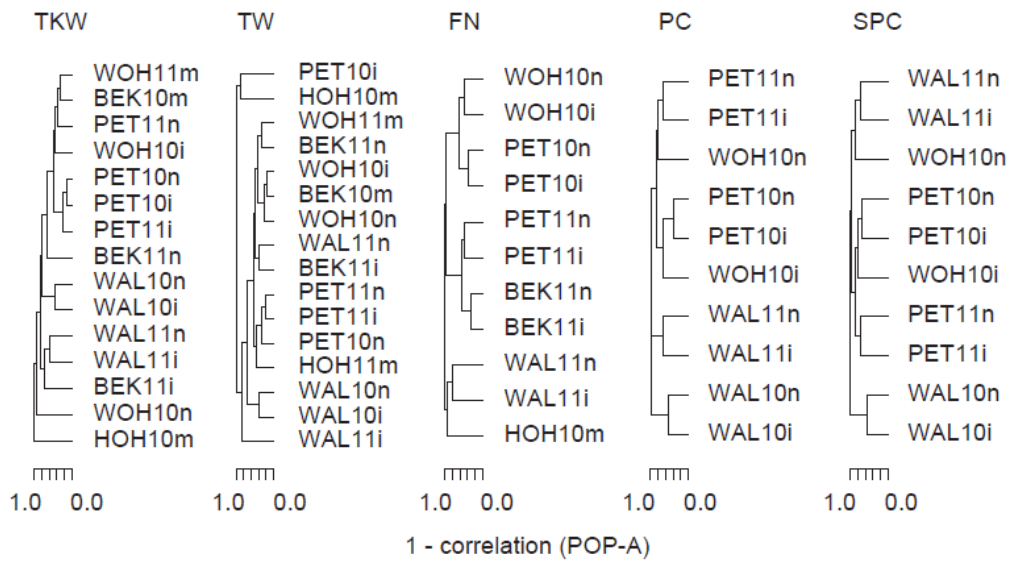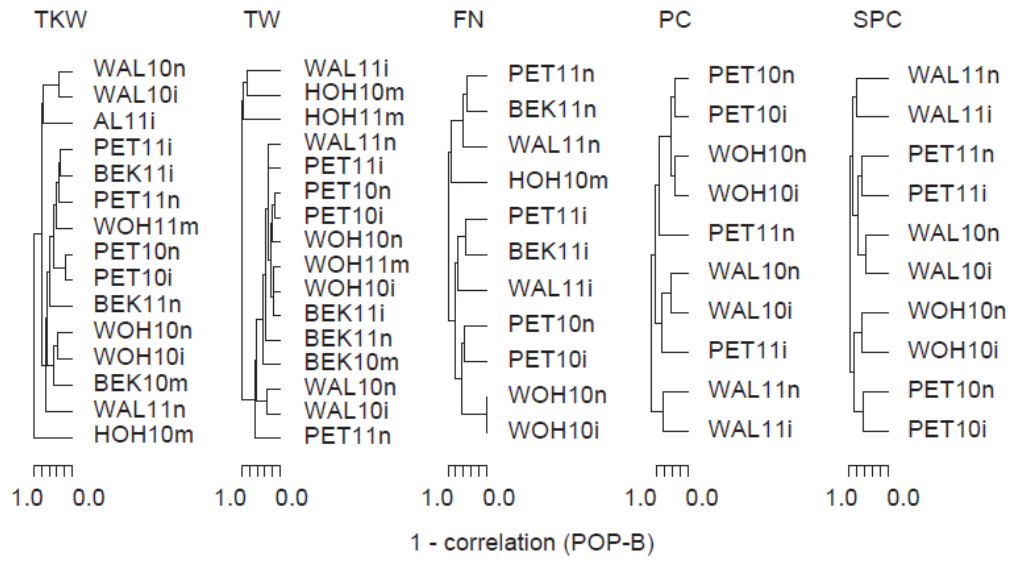

Wang et al. Figure S1

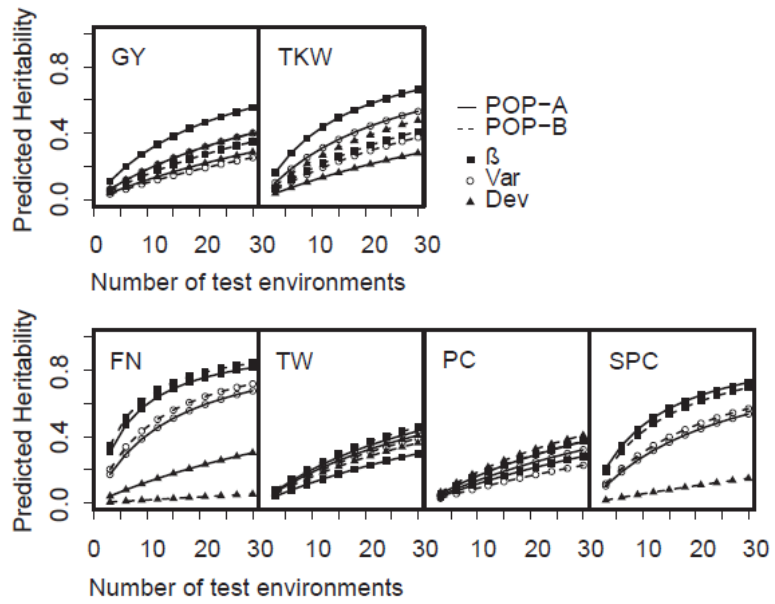

Wang et al. Figure S2
